# Supplementary material for: Mapping Motor Pathways in Parkinson’s Disease Patients with Subthalamic Deep Brain Stimulator: A Diffusion MRI Tractography Study
Source: Springer Nature journal article supplement (doi:10.1007/s40120-022-00331-1), 2022-02-14
Supplement: MOESM1 [file 20130958]

**Mapping Motor Pathways in Parkinson's Disease Patients with Subthalamic Deep Brain**

**Stimulator: A Diffusion MRI Tractography Study**

Yan Li<sup>1+</sup>, Naying He<sup>1+</sup>, Chencheng Zhang<sup>2</sup>, Yu Liu<sup>1</sup>, Jun Li<sup>3</sup>, Bomin Sun<sup>2</sup>, Yijie Lai<sup>2</sup>, Hongyang Li<sup>2</sup>,  
Chengyan Wang<sup>4</sup>, Ewart Mark Haacke<sup>1,5</sup>, Fuhua Yan<sup>1\*</sup>, Dianyou Li<sup>2\*</sup>

<sup>1</sup>Department of Radiology, Ruijin Hospital, Shanghai Jiao Tong University School of Medicine, Shanghai, China

<sup>2</sup>Department of Neurosurgery, Center for Functional Neurosurgery, Ruijin Hospital, Shanghai Jiao Tong University School of Medicine, Shanghai, China

<sup>3</sup>School of Information Science and Technology, ShanghaiTech University, Shanghai, China

<sup>4</sup>Human Phenome Institute, Fudan University, Shanghai, China

<sup>5</sup>Department of Radiology, Wayne State University, Detroit, Michigan, United States

<sup>+</sup>These authors have contributed equally to this work.

<sup>\*</sup>Corresponding authors:

Fuhua Yan, M.D., Ph.D., Email: [yfh11655@rjh.com.cn](mailto:yfh11655@rjh.com.cn)

Dianyou Li, M.D., Ph.D., Email: [ldy11483@rjh.com.cn](mailto:ldy11483@rjh.com.cn)

Address: No.197, Ruijin 2nd Road, Huangpu District, Shanghai, 200025, China

**Table S1. Postoperative MRI protocol.**

| Parameters                    | T1        | DTI                                                        | DTI_B0     |
|-------------------------------|-----------|------------------------------------------------------------|------------|
|                               | MPRAGE    |                                                            |            |
| Orientation                   | sagittal  | transverse                                                 | transverse |
| TR (ms)                       | 3400      | 6500                                                       | 6500       |
| TE (ms)                       | 3         | 126                                                        | 126        |
| TI (ms)                       | 900       | /                                                          | /          |
| FA (degree)                   | 8         | 90                                                         | 90         |
| Matrix                        | 216×224   | 110×110                                                    | 110×110    |
| FOV (mm <sup>2</sup> )        | 216×224   | 220×220                                                    | 220×220    |
| Number of slices              | 192       | 72                                                         | 72         |
| Voxel size (mm <sup>3</sup> ) | 1×1×1     | 2×2×2                                                      | 2×2×2      |
| Acquisition averages          | 1         | b=0 s/mm <sup>2</sup> , 16<br>b=1000 s/mm <sup>2</sup> ,64 | 16         |
| BW (Hz/Px)                    | 260       | 1,336                                                      | 1,336      |
| Phase encoding direction      | R->L      | A->P                                                       | P->A       |
| Acquisition time (min: sec)   | 06:02     | 09:13                                                      | 02:17      |
| SAR (w/kg)                    | 0.03±0.01 | 0.34±0.02                                                  | 0.32±0.02  |

Abbreviations: DTI, diffusion tensor imaging; TR, repetition time; TE, echo time; TI, inversion time; FA, flip angle; FOV, field of view; BW, bandwidth; R, right; L, left; A, anterior; P, posterior; SAR, specific absorption rate.

**Table S2. The mean values and standard deviations of the volume and the FA value of the ROIs.**

| ROIs | Side | Volume (mm <sup>3</sup> ) |          |          | FA        |           |          |
|------|------|---------------------------|----------|----------|-----------|-----------|----------|
|      |      | DBS-on                    | DBS-off  | <i>p</i> | DBS-on    | DBS-off   | <i>p</i> |
| DN   | L    | 395±53                    | 392±50   | 0.331    | 0.25±0.04 | 0.26±0.04 | 0.523    |
|      | R    | 402±52                    | 401±51   | 0.721    | 0.27±0.04 | 0.26±0.04 | 0.413    |
| THA  | L    | 675±86                    | 694±88   | 0.068    | 0.21±0.04 | 0.20±0.03 | 0.170    |
|      | R    | 669±89                    | 673±124  | 0.803    | 0.21±0.04 | 0.20±0.04 | 0.276    |
| PG   | L    | 3179±536                  | 3295±488 | 0.320    | 0.17±0.03 | 0.17±0.02 | 0.709    |
|      | R    | 2934±676                  | 3017±462 | 0.497    | 0.18±0.05 | 0.17±0.03 | 0.360    |
| STN  | L    | 22.3±3.8                  | 22.8±3.5 | 0.447    | 0.37±0.12 | 0.33±0.08 | 0.056    |
|      | R    | 24.4±4.0                  | 23.9±4.0 | 0.334    | 0.35±0.11 | 0.32±0.09 | 0.299    |
| SN   | L    | 143±16                    | 142±19   | 0.327    | 0.31±0.06 | 0.32±0.05 | 0.616    |
|      | R    | 132±16                    | 134±16   | 0.018    | 0.34±0.06 | 0.35±0.06 | 0.594    |
| STR  | L    | 2666±421                  | 2665±409 | 0.931    | 0.25±0.02 | 0.24±0.03 | 0.233    |
|      | R    | 2668±402                  | 2666±402 | 0.889    | 0.25±0.02 | 0.25±0.02 | 0.559    |

There is no significant difference in the volume or FA value of the defined seed and target ROIs between the DBS-on and the DBS-off conditions. Values are reported as mean ± standard deviation.

Abbreviations: FA, fractional anisotropy; ROI, regions-of-interest; n, number of patients; DN, dentate nucleus; THA, thalamus; PG, precentral gyrus; STN, subthalamic nucleus; SN, substantia nigra; STR, striatum; L, left side; R, right side.

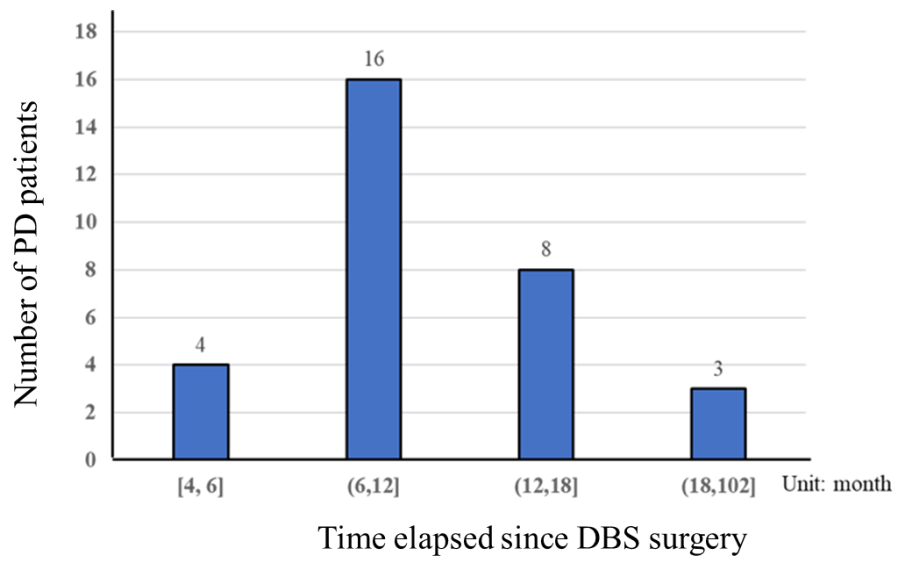

**Figure S1. Follow-up for MRIs obtained after DBS surgery.** The duration from the DBS implantation surgery to the post MRI session ranged from 4 to 102 months in the patients. Abbreviations: DBS, deep brain stimulation.

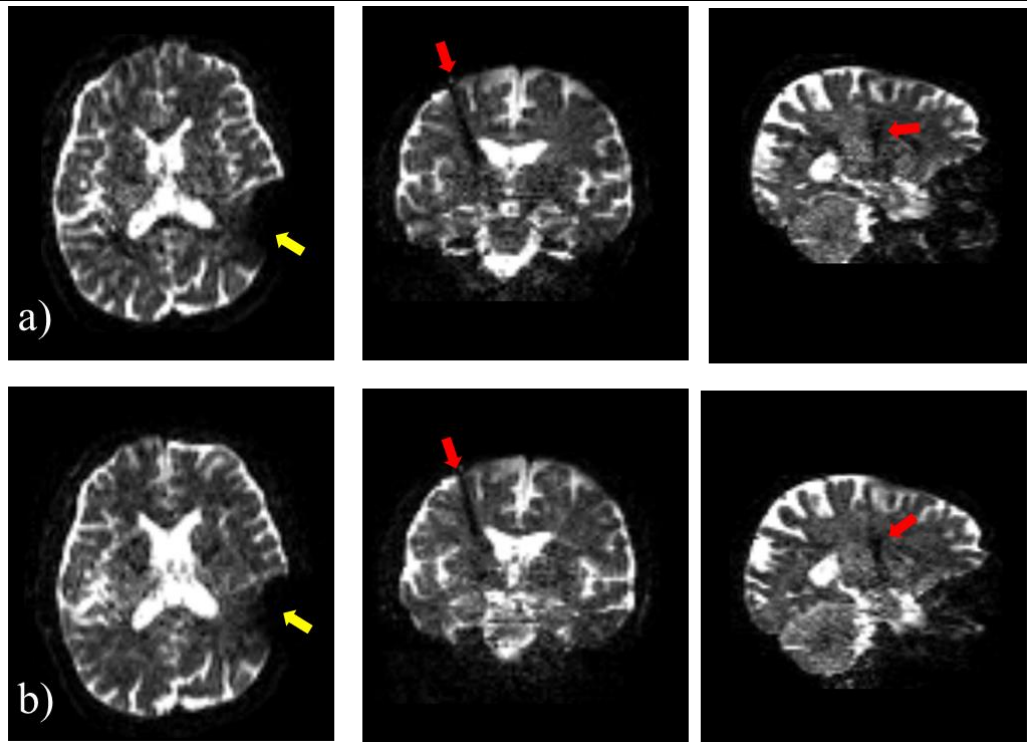

**Figure S2. The  $B_0$  images of one representative patient in the a) DBS-on and b) DBS-off states.** A trained MRI analyst conducted a visual image quality assessment of all 80 volumes for each DTI scan. The yellow arrows indicate artifacts generated by the extension cables which were placed on the skull, resulting in signal loss observed over the parietal and temporal regions of the left hemisphere. The red arrows indicate the artifacts generated by the DBS electrodes.

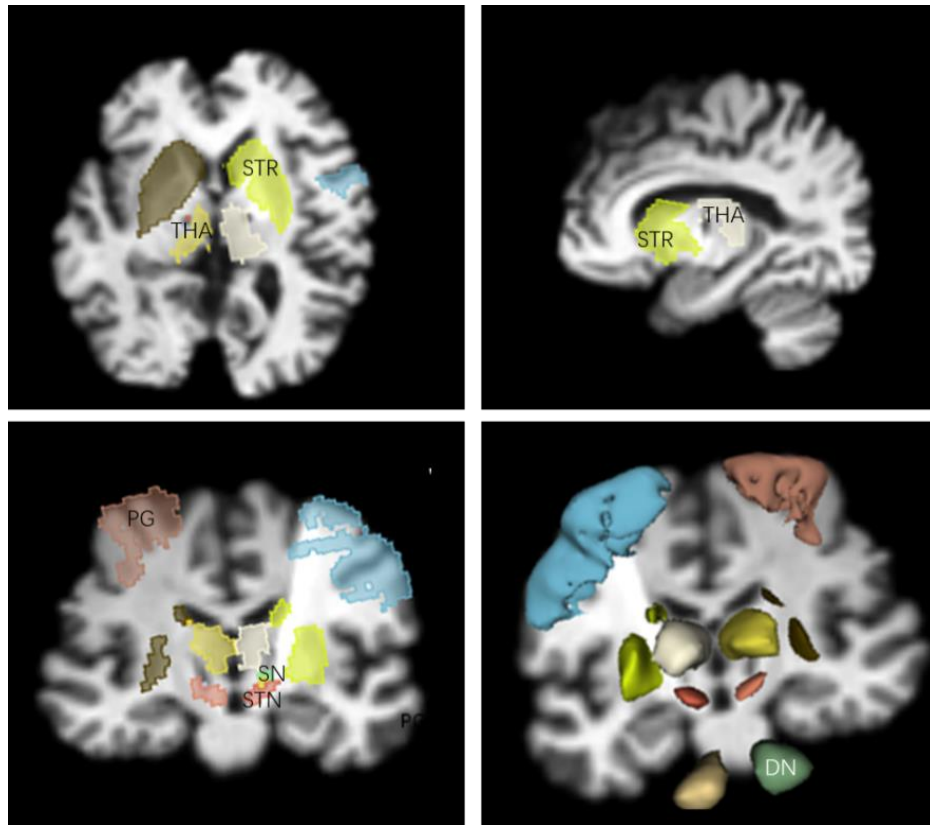

**Figure S3.** The segmentation outlines of the twelve ROIs in a representative patient. Abbreviations: STR, striatum; THA, thalamus; PG, precentral gyrus; SN, substantia nigra; STN, subthalamic nucleus; DN, dentate nucleus.
